# Supplementary material for: Proteomic and Transcriptomic Landscapes of Alström and Bardet–Biedl Syndromes
Source: MDPI journal article supplement (doi:10.3390/genes13122370), 2022-12-15
Supplement: s1 [file s1]

Table S1. List of significantly up- and downregulated transcripts in ALMS and BBS.

| upregulated in ALMS<br>(FC > 1.5) | upregulated in BBS<br>(FC > 1.5) | downregulated in ALMS<br>(FC < 0.67) | downregulated in BBS<br>(FC < 0.67) |
|-----------------------------------|----------------------------------|--------------------------------------|-------------------------------------|
| <i>TRIM4</i>                      | <i>TRIM4</i>                     | <i>ZIC1</i>                          | <i>PTH1R</i>                        |
| <i>HIST1H3C</i>                   | <i>HIST1H3C</i>                  | <i>PTH1R</i>                         | <i>ZIC1</i>                         |
| <i>CCDC152</i>                    | <i>CCDC152</i>                   | <i>STMN2</i>                         | <i>PAX7</i>                         |
| <i>CTCF</i>                       | <i>HIST1H4L</i>                  | <i>PAX7</i>                          | <i>STMN2</i>                        |
| <i>HIST1H4L</i>                   | <i>ZNF558</i>                    | <i>CNTFR</i>                         | <i>SCGB3A2</i>                      |
| <i>ZNF558</i>                     | <i>TEK</i>                       | <i>FOXA1</i>                         | <i>CRIL</i>                         |
| <i>HTR7</i>                       | <i>HMOX1</i>                     | <i>SCGB3A2</i>                       | <i>MECOM</i>                        |
| <i>SGIP1</i>                      | <i>HTR7</i>                      | <i>OLIG3</i>                         | <i>CNTFR</i>                        |
| <i>VSIG1</i>                      | <i>SGIP1</i>                     | <i>PAX6</i>                          | <i>HAPLN1</i>                       |
| <i>IFNA16</i>                     | <i>VSIG1</i>                     | <i>RSPO3</i>                         | <i>DPP6</i>                         |
| <i>ENPEP</i>                      |                                  | <i>PITX2</i>                         | <i>RSPO3</i>                        |
|                                   |                                  | <i>SLITRK2</i>                       | <i>PAX6</i>                         |
|                                   |                                  | <i>MECOM</i>                         | <i>GTF2A1L</i>                      |
|                                   |                                  | <i>NPFFR2</i>                        | <i>FOXA1</i>                        |
|                                   |                                  | <i>DKK1</i>                          | <i>TBX1</i>                         |
|                                   |                                  | <i>CRIL</i>                          | <i>OLIG3</i>                        |
|                                   |                                  | <i>HAPLN1</i>                        | <i>PITX2</i>                        |
|                                   |                                  | <i>SCNN1G</i>                        | <i>LOC101927668</i>                 |
|                                   |                                  | <i>SCD5</i>                          | <i>SCD5</i>                         |
|                                   |                                  | <i>TBX1</i>                          | <i>TENM1</i>                        |
|                                   |                                  | <i>SP8</i>                           | <i>TFAP2C</i>                       |
|                                   |                                  | <i>TFAP2C</i>                        | <i>SP8</i>                          |
|                                   |                                  | <i>ARSE</i>                          | <i>ARSE</i>                         |
|                                   |                                  | <i>SLC16A12</i>                      | <i>CACNA2D3</i>                     |
|                                   |                                  | <i>TMEM88</i>                        | <i>TMEM88</i>                       |
|                                   |                                  | <i>CHRNA3</i>                        | <i>NRG3</i>                         |
|                                   |                                  | <i>LOXL3</i>                         | <i>SCNN1G</i>                       |
|                                   |                                  | <i>SORBS2</i>                        | <i>NTRK3</i>                        |

|  |  |                                                                                                                 |                                                                                                                                                                                                                  |
|--|--|-----------------------------------------------------------------------------------------------------------------|------------------------------------------------------------------------------------------------------------------------------------------------------------------------------------------------------------------|
|  |  | <i>DMBX1</i><br><i>DLL1</i><br><i>ROR2</i><br><i>CHRNA4</i><br><i>TMEM51</i><br><i>TMEM150C</i><br><i>ZADH2</i> | <i>MCOLN3</i><br><i>GABRB2</i><br><i>NR5A2</i><br><i>NPFFR2</i><br><i>SORBS2</i><br><i>ADGRA2</i><br><i>DLL1</i><br><i>VIPR2</i><br><i>CHRNA3</i><br><i>ZFHX4</i><br><i>DMBX1</i><br><i>SEZ6</i><br><i>POTEF</i> |
|--|--|-----------------------------------------------------------------------------------------------------------------|------------------------------------------------------------------------------------------------------------------------------------------------------------------------------------------------------------------|

Table S2. List of significantly up- and downregulated proteins in ALMS and BBS.

| upregulated in ALMS<br>(FC > 1.5) | upregulated in BBS<br>(FC > 1.5) | downregulated in ALMS<br>(FC < 0.67) | downregulated in BBS<br>(FC < 0.67) |
|-----------------------------------|----------------------------------|--------------------------------------|-------------------------------------|
| CRYZ                              | CRYZ                             | MYH14                                | IFITM3                              |
| CGREF1                            | DYNC2LI1                         | HSD11B2                              | GPC4                                |
| CDC25C                            | NAB2                             | TMEM63A                              | MBP                                 |
| FAH                               | APOBEC3B                         | ALMS1                                | CLN8                                |
| ASAH1                             | LGALS1                           | GALNT3                               | SOX3                                |
| HSBP1                             | FABP7                            | IFITM3                               |                                     |
| CDKN2AIPNL                        | SELENBP1                         | ITPR2                                |                                     |
| AGGF1                             | FHL1                             | ZSCAN10                              |                                     |
| C9orf64                           | HEBP1                            | GPC4                                 |                                     |
| TCEAL5                            | KIF17                            | METTL7A                              |                                     |
| NAB2                              | TRIM5                            | ARRB1                                |                                     |
| ARHGAP8                           | DERA                             | POU5F1                               |                                     |
|                                   | SCRN2                            | CD9                                  |                                     |
|                                   | DDAH2                            |                                      |                                     |
|                                   | CYBA                             |                                      |                                     |
|                                   | DMXL2                            |                                      |                                     |

Table S3. List of reactome pathways significantly up- and down-regulated by both proteomic and transcriptomic analysis in ALMS and BBS syndromes. P-proteomics; T- transcriptomics.

| Reactome Pathway                                                                                                                                                                                                                                                                                                                                                                                                                                                                                                                                                                                                                                                                                                                                                                                                                                                                                                                                                                                                                                                                                                                                                                                                                                                                                                                                                                                                                                                                                                                                                                                                                                                          | ALMS |   | BBS |   |
|---------------------------------------------------------------------------------------------------------------------------------------------------------------------------------------------------------------------------------------------------------------------------------------------------------------------------------------------------------------------------------------------------------------------------------------------------------------------------------------------------------------------------------------------------------------------------------------------------------------------------------------------------------------------------------------------------------------------------------------------------------------------------------------------------------------------------------------------------------------------------------------------------------------------------------------------------------------------------------------------------------------------------------------------------------------------------------------------------------------------------------------------------------------------------------------------------------------------------------------------------------------------------------------------------------------------------------------------------------------------------------------------------------------------------------------------------------------------------------------------------------------------------------------------------------------------------------------------------------------------------------------------------------------------------|------|---|-----|---|
|                                                                                                                                                                                                                                                                                                                                                                                                                                                                                                                                                                                                                                                                                                                                                                                                                                                                                                                                                                                                                                                                                                                                                                                                                                                                                                                                                                                                                                                                                                                                                                                                                                                                           | P    | T | P   | T |
| RRNA_MODIFICATION_IN_THE_NUCLEUS_AND_CYTOSOL                                                                                                                                                                                                                                                                                                                                                                                                                                                                                                                                                                                                                                                                                                                                                                                                                                                                                                                                                                                                                                                                                                                                                                                                                                                                                                                                                                                                                                                                                                                                                                                                                              | ↓    | ↑ | ↓   | ↑ |
| MITOCHONDRIAL_TRANSLATION<br>TRANSPORT_OF_MATURE_TRANSCRIPT_TO_CYTOPLASM<br>TRANSLATION                                                                                                                                                                                                                                                                                                                                                                                                                                                                                                                                                                                                                                                                                                                                                                                                                                                                                                                                                                                                                                                                                                                                                                                                                                                                                                                                                                                                                                                                                                                                                                                   |      |   | ↓   | ↑ |
| STABILIZATION_OF_P53<br>REGULATION_OF_PTEN_STABILITY_AND_ACTIVITY<br>CROSS_PRESENTATION_OF_SOLUBLE_EXOGENOUS_ANTIGENS_ENDOSOMES_<br>DECTIN_1_MEDIATED_NONCANONICAL_NF_KB_SIGNALING<br>DNA_REPLICATION<br>G2_M_CHECKPOINTS<br>ASSEMBLY_OF_THE_PRE_REPLICATIVE_COMPLEX<br>DNA_REPLICATION_PRE_INITIATION                                                                                                                                                                                                                                                                                                                                                                                                                                                                                                                                                                                                                                                                                                                                                                                                                                                                                                                                                                                                                                                                                                                                                                                                                                                                                                                                                                    | ↑    | ↑ | ↑   | ↑ |
| AUF1_HNRNP_D0_BINDS_AND_DESTABILIZES_MRNA<br>REACTOME_APC_C_CDH1_MEDIATED_DEGRADATION_OF_CDC20_AND_OTHER_A<br>PC_C_CDH1_TARGETED_PROTEINS_IN_LATE_MITOSIS_EARLY_G1<br>SWITCHING_OF_ORIGINS_TO_A_POST_REPLICATIVE_STATE<br>METABOLISM_OF_POLYAMINES<br>DNA_STRAND_ELONGATION<br>DEGRADATION_OF_GLI1_BY_THE_PROTEASOME<br>APC_C_MEDIATED_DEGRADATION_OF_CELL_CYCLE_PROTEINS<br>ORC1_REMOVAL_FROM_CHROMATIN<br>S_PHASE<br>DEGRADATION_OF_DVL<br>FCER1_MEDIATED_NF_KB_ACTIVATION<br>NEGATIVE_REGULATION_OF_NOTCH4_SIGNALING<br>DOWNSTREAM_SIGNALING_EVENTS_OF_B_CELL_RECEPTOR_BCR_<br>CELLULAR_RESPONSE_TO_HYPOXIA<br>DEGRADATION_OF_AXIN<br>CELL_CYCLE_CHECKPOINTS<br>REGULATION_OF_RAS_BY_GAPS<br>UCH_PROTEINASES<br>REGULATION_OF_RUNX3_EXPRESSION_ANDACTIVITY<br>MITOTIC_G1_PHASE_AND_G1_S_TRANSITION<br>HIV_INFECTION<br>REGULATION_OF_MRNA_STABILITY_BY_PROTEINS_THAT_BIND_AU_RICH_ELE<br>MENTS<br>HOST_INTERACTIONS_OF_HIV_FACTORS<br>THE_ROLE_OF_GTSE1_IN_G2_M_PROGRESSION_AFTER_G2_CHECKPOINT<br>G2_M_DNA_DAMAGE_CHECKPOIN<br>G1_S_DNA_DAMAGE_CHECKPOINTS<br>ACTIVATION_OF_ATR_IN_RESPONSE_TO_REPLICATION_STRESS<br>RESOLUTION_OF_AP_SITES_VIA_THE_MULTIPLE_NUCLEOTIDE_PATCH_REPLAC<br>EMENT_PATHWAY<br>LAGGING_STRAND_SYNTHESIS<br>PCNA_DEPENDENT_LONG_PATCH_BASE_EXCISION_REPAIR<br>SEPARATION_OF_SISTER_CHROMATIDS<br>CYCLIN_A_CDK2_ASSOCIATED_EVENTS_AT_S_PHASE_ENTRY<br>SIGNALING_BY_THE_B_CELL_RECEPTOR_BCR_<br>ANTIGEN_PROCESSING_UBIQUITINATION_PROTEASOME_DEGRADATION<br>INTERCONVERSION_OF_NUCLEOTIDE_DI_AND_TRIPHOSPHATES<br>DNA_REPAIR<br>PROCESSIVE_SYNTHESIS_ON_THE_LAGGING_STRAND<br>CELL_CYCLE_MITOTIC<br>MISMATCH_REPAIR<br>INTERLEUKIN_1_SIGNALING |      |   | ↑   | ↑ |

|                                                                          |   |   |   |   |
|--------------------------------------------------------------------------|---|---|---|---|
| MAPK6_MAPK4_SIGNALING                                                    |   |   |   |   |
| TELOMERE_C_STRAND_LAGGING_STRAND_SYNTHESIS                               |   |   |   |   |
| UB_SPECIFIC_PROCESSING_PROTEASES                                         |   |   |   |   |
| SCF_SKP2_MEDIATED_DEGRADATION_OF_P27_P21                                 |   |   |   |   |
| PROCESSING_OF_DNA_DOUBLE_STRAND_BREAK_ENDS                               |   |   |   |   |
| DEGRADATION_OF_BETA_CATENIN_BY_THE_DESTRUCTION_COMPLEX                   |   |   |   |   |
| GAP_FILLING_DNA_REPAIR_SYNTHESIS_AND_LIGATION_IN_GG_NER                  |   |   |   |   |
| RECOGNITION_OF_DNA_DAMAGE_BY_PCNA_CONTAINING_REPLICATION_COMPLEX         |   |   |   |   |
| NUCLEOTIDE_SALVAGE                                                       |   |   |   |   |
| METABOLISM_OF_NUCLEOTIDES                                                |   |   |   |   |
| DEUBIQUITINATION                                                         |   |   |   |   |
| NEDDYLATION                                                              |   |   |   |   |
| CLEC7A_DECTIN_1_SIGNALING                                                |   |   |   |   |
| RESOLUTION_OF_ABASIC_SITES_AP_SITES                                      |   |   |   |   |
| BUDDING_AND_MATURATION_OF_HIV_VIRION                                     |   |   |   |   |
| INTRAFLAGELLAR_TRANSPORT                                                 |   |   |   |   |
| ENDOSOMAL_SORTING_COMPLEX_REQUIRED_FOR_TRANSPORT_ESCRT                   |   |   |   |   |
| TRANSCRIPTIONAL_REGULATION_OF_PLURIPOTENT_STEM_CELLS                     | ↓ | ↓ | ↓ | ↓ |
| SLC_MEDIATED_TRANSMEMBRANE_TRANSPORT                                     | ↓ | ↓ |   |   |
| TRANSPORT_OF_VITAMINS_NUCLEOSIDES_AND_RELATED_MOLECULES                  | ↓ | ↓ |   |   |
| ION_TRANSPORT_BY_P_TYPE_ATPASES                                          |   |   |   |   |
| NCAM1_INTERACTIONS                                                       |   |   |   |   |
| GLYCOSAMINOGLYCAN_METABOLISM                                             |   |   |   |   |
| CALNEXIN_CALRETICULIN_CYCLE                                              |   |   |   |   |
| SYNDECAN_INTERACTIONS                                                    |   |   |   |   |
| TRANSPORT_OF_BILE_SALTS_AND_ORGANIC_ACIDS_METAL_IONS_AND_AMINE_COMPOUNDS |   |   |   |   |
| A_TETRASACCHARIDE_LINKER_SEQUENCE_IS_REQUIRED_FOR_GAG_SYNTHESIS          |   |   |   |   |
| CHONDROITIN_SULFATE_DERMATAN_SULFATE_METABOLISM                          |   |   | ↓ | ↓ |
| HEPARAN_SULFATE_HEPARIN_HS_GAG_METABOLISM                                |   |   |   |   |
| ER_QUALITY_CONTROL_COMPARTMENT_ERQC                                      |   |   |   |   |
| DISEASES_ASSOCIATED_WITH_GLYCOSAMINOGLYCAN_METABOLISM                    |   |   |   |   |
| N_GLYCAN_TRIMMING_IN_THE_ER_AND_CALNEXIN_CALRETICULIN_CYCLE              |   |   |   |   |
| HS_GAG_DEGRADATION                                                       |   |   |   |   |
| SYNTHESIS_OF_VERY_LONG_CHAIN_FATTY_ACYL_COAS                             |   |   |   |   |
| DEFECTIVE_B4GALT7_CAUSES_EDS_PROGEROID_TYPE                              |   |   |   |   |
| FATTY_ACYL_COA_BIOSYNTHESIS                                              |   |   |   |   |
| HS_GAG_BIOSYNTHESIS                                                      |   |   |   |   |
